# Supplementary material for: Health Information Sources Influencing Health Literacy in Different Social Contexts across Age Groups in Northern Thailand Citizens
Source: MDPI journal article supplement (doi:10.3390/ijerph19106051), 2022-05-16
Supplement: s1 [file s1]

**Table S1.** The reliability test of five THLQ subindices.

| Indices                                          | Items | Cronbach's Alpha |               |
|--------------------------------------------------|-------|------------------|---------------|
|                                                  |       | Validation study | Present study |
| General HL                                       | 42    | 0.9411           | 0.9456        |
| (1) Accessing Information Relevant to Health     | 8     | 0.8975           | 0.9542        |
| (2) Understanding Information Relevant to Health | 7     | 0.8605           | 0.8495        |
| (3) Questioning Information Relevant to Health   | 12    | 0.9023           | 0.9115        |
| (4) Appraising Information Relevant to Health    | 7     | 0.8843           | 0.8248        |
| (5) Applying Information to Change Behaviors     | 8     | 0.8214           | 0.7562        |

HL, Health literacy; THIQ, Thai health literacy questionnaire.

**Table S2.** Frequency and percentage of health literacy levels in the sample population.

| Items ( <i>n</i> =1,510)                            |                                                                        | Health Literacy Level, <i>n</i> (%) |                   |               |                |               |
|-----------------------------------------------------|------------------------------------------------------------------------|-------------------------------------|-------------------|---------------|----------------|---------------|
|                                                     |                                                                        | Never/<br>Cannot<br>Do              | Very<br>difficult | Difficult     | Easy           | Very<br>Easy  |
| <b>Accessing Information Relevant to Health</b>     |                                                                        |                                     |                   |               |                |               |
| S1                                                  | What to do if someone is unconscious                                   | 779<br>(51.6)                       | 37 (2.4)          | 104 (6.9)     | 398<br>(26.4)  | 192<br>(12.7) |
| S2                                                  | Symptoms require immediate hospitalization                             | 518<br>(34.3)                       | 46 (3.1)          | 109 (7.2)     | 654<br>(43.3)  | 183<br>(12.1) |
| S3                                                  | Health check-up or vaccinations should be given                        | 520<br>(34.4)                       | 48 (3.2)          | 122 (8.1)     | 658<br>(43.6)  | 161<br>(10.7) |
| S4                                                  | Self-prevention from communicable diseases                             | 479<br>(31.7)                       | 35 (2.3)          | 95 (6.3)      | 712<br>(47.2)  | 189<br>(12.5) |
| S5                                                  | How to maintain health                                                 | 404<br>(26.8)                       | 32 (2.1)          | 68 (4.5)      | 698<br>(46.2)  | 308<br>(20.4) |
| S6                                                  | Proper way to manage stress                                            | 434<br>(28.7)                       | 33 (2.2)          | 91 (6.0)      | 768<br>(50.9)  | 184<br>(12.2) |
| S7                                                  | Reliable information about medicines, cosmetics, herbs and supplements | 524<br>(34.7)                       | 43 (2.9)          | 162<br>(10.7) | 625<br>(41.4)  | 156<br>(10.3) |
| S8                                                  | Reliable information about health services, new products or equipment  | 645<br>(42.7)                       | 106 (7.0)         | 223<br>(14.8) | 433<br>(28.7)  | 103<br>(6.8)  |
| <b>Understanding Information Relevant to Health</b> |                                                                        |                                     |                   |               |                |               |
| U9                                                  | Public media, online media or what to do in a medical emergency        | 175<br>(11.6)                       | 45 (3.0)          | 158<br>(10.5) | 874<br>(57.9)  | 257<br>(17.0) |
| U10                                                 | Why you should get a health screening                                  | 103 (6.8)                           | 23 (1.5)          | 108 (7.2)     | 1060<br>(70.2) | 216<br>(14.3) |
| U11                                                 | Understand why you need a vaccine                                      | 98 (6.5)                            | 18 (1.2)          | 78 (5.2)      | 1042<br>(69.0) | 274<br>(18.2) |

|                                                   |                                                                                                                  |            |           |            |             |            |
|---------------------------------------------------|------------------------------------------------------------------------------------------------------------------|------------|-----------|------------|-------------|------------|
| U12                                               | Warnings about how important and necessary healthy behaviors are                                                 | 48 (3.2)   | 22 (1.4)  | 36 (2.4)   | 1016 (67.3) | 388 (25.7) |
| U13                                               | How to maintain good mental health                                                                               | 77 (5.1)   | 25 (1.7)  | 61 (4.0)   | 1073 (71.1) | 274 (18.2) |
| U14                                               | Understand the labels for drugs, cosmetics, dietary supplements, herbs, medical devices and dangerous substances | 132 (8.8)  | 47 (3.1)  | 167 (11.1) | 872 (57.7)  | 292 (19.3) |
| U15                                               | Description of new health services, products or equipment                                                        | 334 (22.2) | 105 (7.0) | 280 (18.5) | 653 (43.2)  | 138 (9.1)  |
| <b>Questioning Information Relevant to Health</b> |                                                                                                                  |            |           |            |             |            |
| Q16                                               | Ask your doctor about your rights, expenses and concerns                                                         | 69 (4.6)   | 19 (1.3)  | 400 (26.5) | 727 (48.1)  | 295 (19.5) |
| Q17                                               | Ask the nurse about your rights, expenses and concerns.                                                          | 71 (4.7)   | 22 (1.5)  | 461 (30.5) | 710 (47.0)  | 246 (16.3) |
| Q18                                               | Ask the hospital worker about your rights, expenses and concerns.                                                | 67 (4.5)   | 15 (1.0)  | 616 (40.8) | 606 (40.1)  | 206 (13.6) |
| Q19                                               | Ask your doctor about the disease and the practice of prevention                                                 | 64 (4.3)   | 13 (0.9)  | 431 (28.5) | 722 (47.8)  | 280 (18.5) |
| Q20                                               | Ask the nurse about the disease and the practice of prevention                                                   | 66 (4.4)   | 14 (0.9)  | 488 (32.3) | 723 (47.9)  | 219 (14.5) |
| Q21                                               | Ask the health volunteer about the disease and the practice of prevention                                        | 74 (4.8)   | 10 (0.7)  | 627 (41.5) | 612 (40.5)  | 189 (12.5) |
| Q22                                               | Ask your doctor for information on how to stay healthy                                                           | 146 (9.7)  | 14 (0.9)  | 646 (42.8) | 532 (35.2)  | 172 (11.4) |
| Q23                                               | Ask the nurse for information on how to stay healthy                                                             | 147 (9.7)  | 15 (1.0)  | 727 (48.2) | 499 (33.0)  | 122 (8.1)  |
| Q24                                               | Ask the health volunteer for information on how to stay healthy                                                  | 141 (9.3)  | 9 (0.6)   | 786 (52.1) | 456 (30.2)  | 118 (7.8)  |
| Q25                                               | Ask your doctor about health products                                                                            | 167 (11.1) | 17 (1.1)  | 669 (44.3) | 514 (34.0)  | 143 (9.5)  |
| Q26                                               | Ask the nurse about health products                                                                              | 171 (11.3) | 16 (1.1)  | 673 (44.6) | 523 (34.6)  | 127 (8.4)  |
| Q27                                               | Ask the health volunteer about health products                                                                   | 180 (11.9) | 12 (0.8)  | 645 (42.7) | 522 (34.6)  | 151 (10.0) |
| <b>Appraising Information Relevant to Health</b>  |                                                                                                                  |            |           |            |             |            |
| D28                                               | Decide how you follow an emergency information                                                                   | 101 (6.7)  | 34 (2.2)  | 140 (9.3)  | 930 (61.6)  | 305 (20.2) |

|                                                 |                                                                                        |            |           |            |             |            |
|-------------------------------------------------|----------------------------------------------------------------------------------------|------------|-----------|------------|-------------|------------|
| D29                                             | Decide how you follow a complete treatment plan                                        | 56 (3.7)   | 24 (1.6)  | 87 (5.8)   | 1030 (68.2) | 313 (20.7) |
| D30                                             | Decide what you will do in order to use the drug correctly                             | 78 (5.2)   | 20 (1.3)  | 97 (6.4)   | 1048 (69.4) | 267 (17.7) |
| D31                                             | Decide how you should exercise                                                         | 52 (3.4)   | 21 (1.4)  | 101 (6.7)  | 1084 (71.8) | 252 (16.7) |
| D32                                             | Decide what foods to buy or how to cook                                                | 242 (16.0) | 48 (3.2)  | 176 (11.7) | 869 (57.5)  | 175 (11.6) |
| D33                                             | Decide what activities you should do to reduce stress                                  | 56 (3.7)   | 15 (1.0)  | 52 (3.4)   | 1050 (69.6) | 337 (22.3) |
| D34                                             | Decide to choose a supplement, nutrition or herbs                                      | 121 (8.0)  | 81 (5.4)  | 223 (14.8) | 919 (60.9)  | 166 (11.0) |
| <b>Applying Information to Change Behaviors</b> |                                                                                        |            |           |            |             |            |
| B35                                             | Choose bland food more than sweet, salty, and oily food                                | 24 (1.6)   | 37 (2.5)  | 286 (18.9) | 871 (57.7)  | 292 (19.3) |
| B36                                             | Do not share a spoon with others while eating                                          | 164 (10.9) | 23 (1.5)  | 150 (9.9)  | 805 (53.3)  | 368 (24.4) |
| B37                                             | Exercise to strengthen muscles 3-4 days a week.                                        | 209 (13.8) | 40 (2.7)  | 276 (18.3) | 724 (47.9)  | 261 (17.3) |
| B38                                             | Manage your stress appropriately                                                       | 38 (2.5)   | 18 (1.2)  | 110 (7.3)  | 1072 (71.0) | 272 (18.0) |
| B39                                             | Read and review the information provided with cosmetics, supplements or herbs          | 236 (15.6) | 63 (4.2)  | 178 (11.8) | 802 (53.2)  | 230 (15.2) |
| B40                                             | Inspect health products, services, cosmetics, medical devices and hazardous substances | 291 (19.3) | 132 (8.7) | 289 (19.2) | 629 (41.7)  | 168 (11.1) |
| B41                                             | If you find someone drowning, help by “yelling, throwing, handing” and calling 1669.   | 121 (8.0)  | 85 (5.6)  | 291 (19.3) | 826 (54.7)  | 187 (12.4) |
| B42                                             | Encourage all children to receive developmental assessment and vaccination as needed   | 75 (5.0)   | 30 (2.0)  | 94 (6.2)   | 882 (58.4)  | 429 (28.4) |
